# Supplementary material
Source: PubMed Central journal article supplement (PMC11113188)

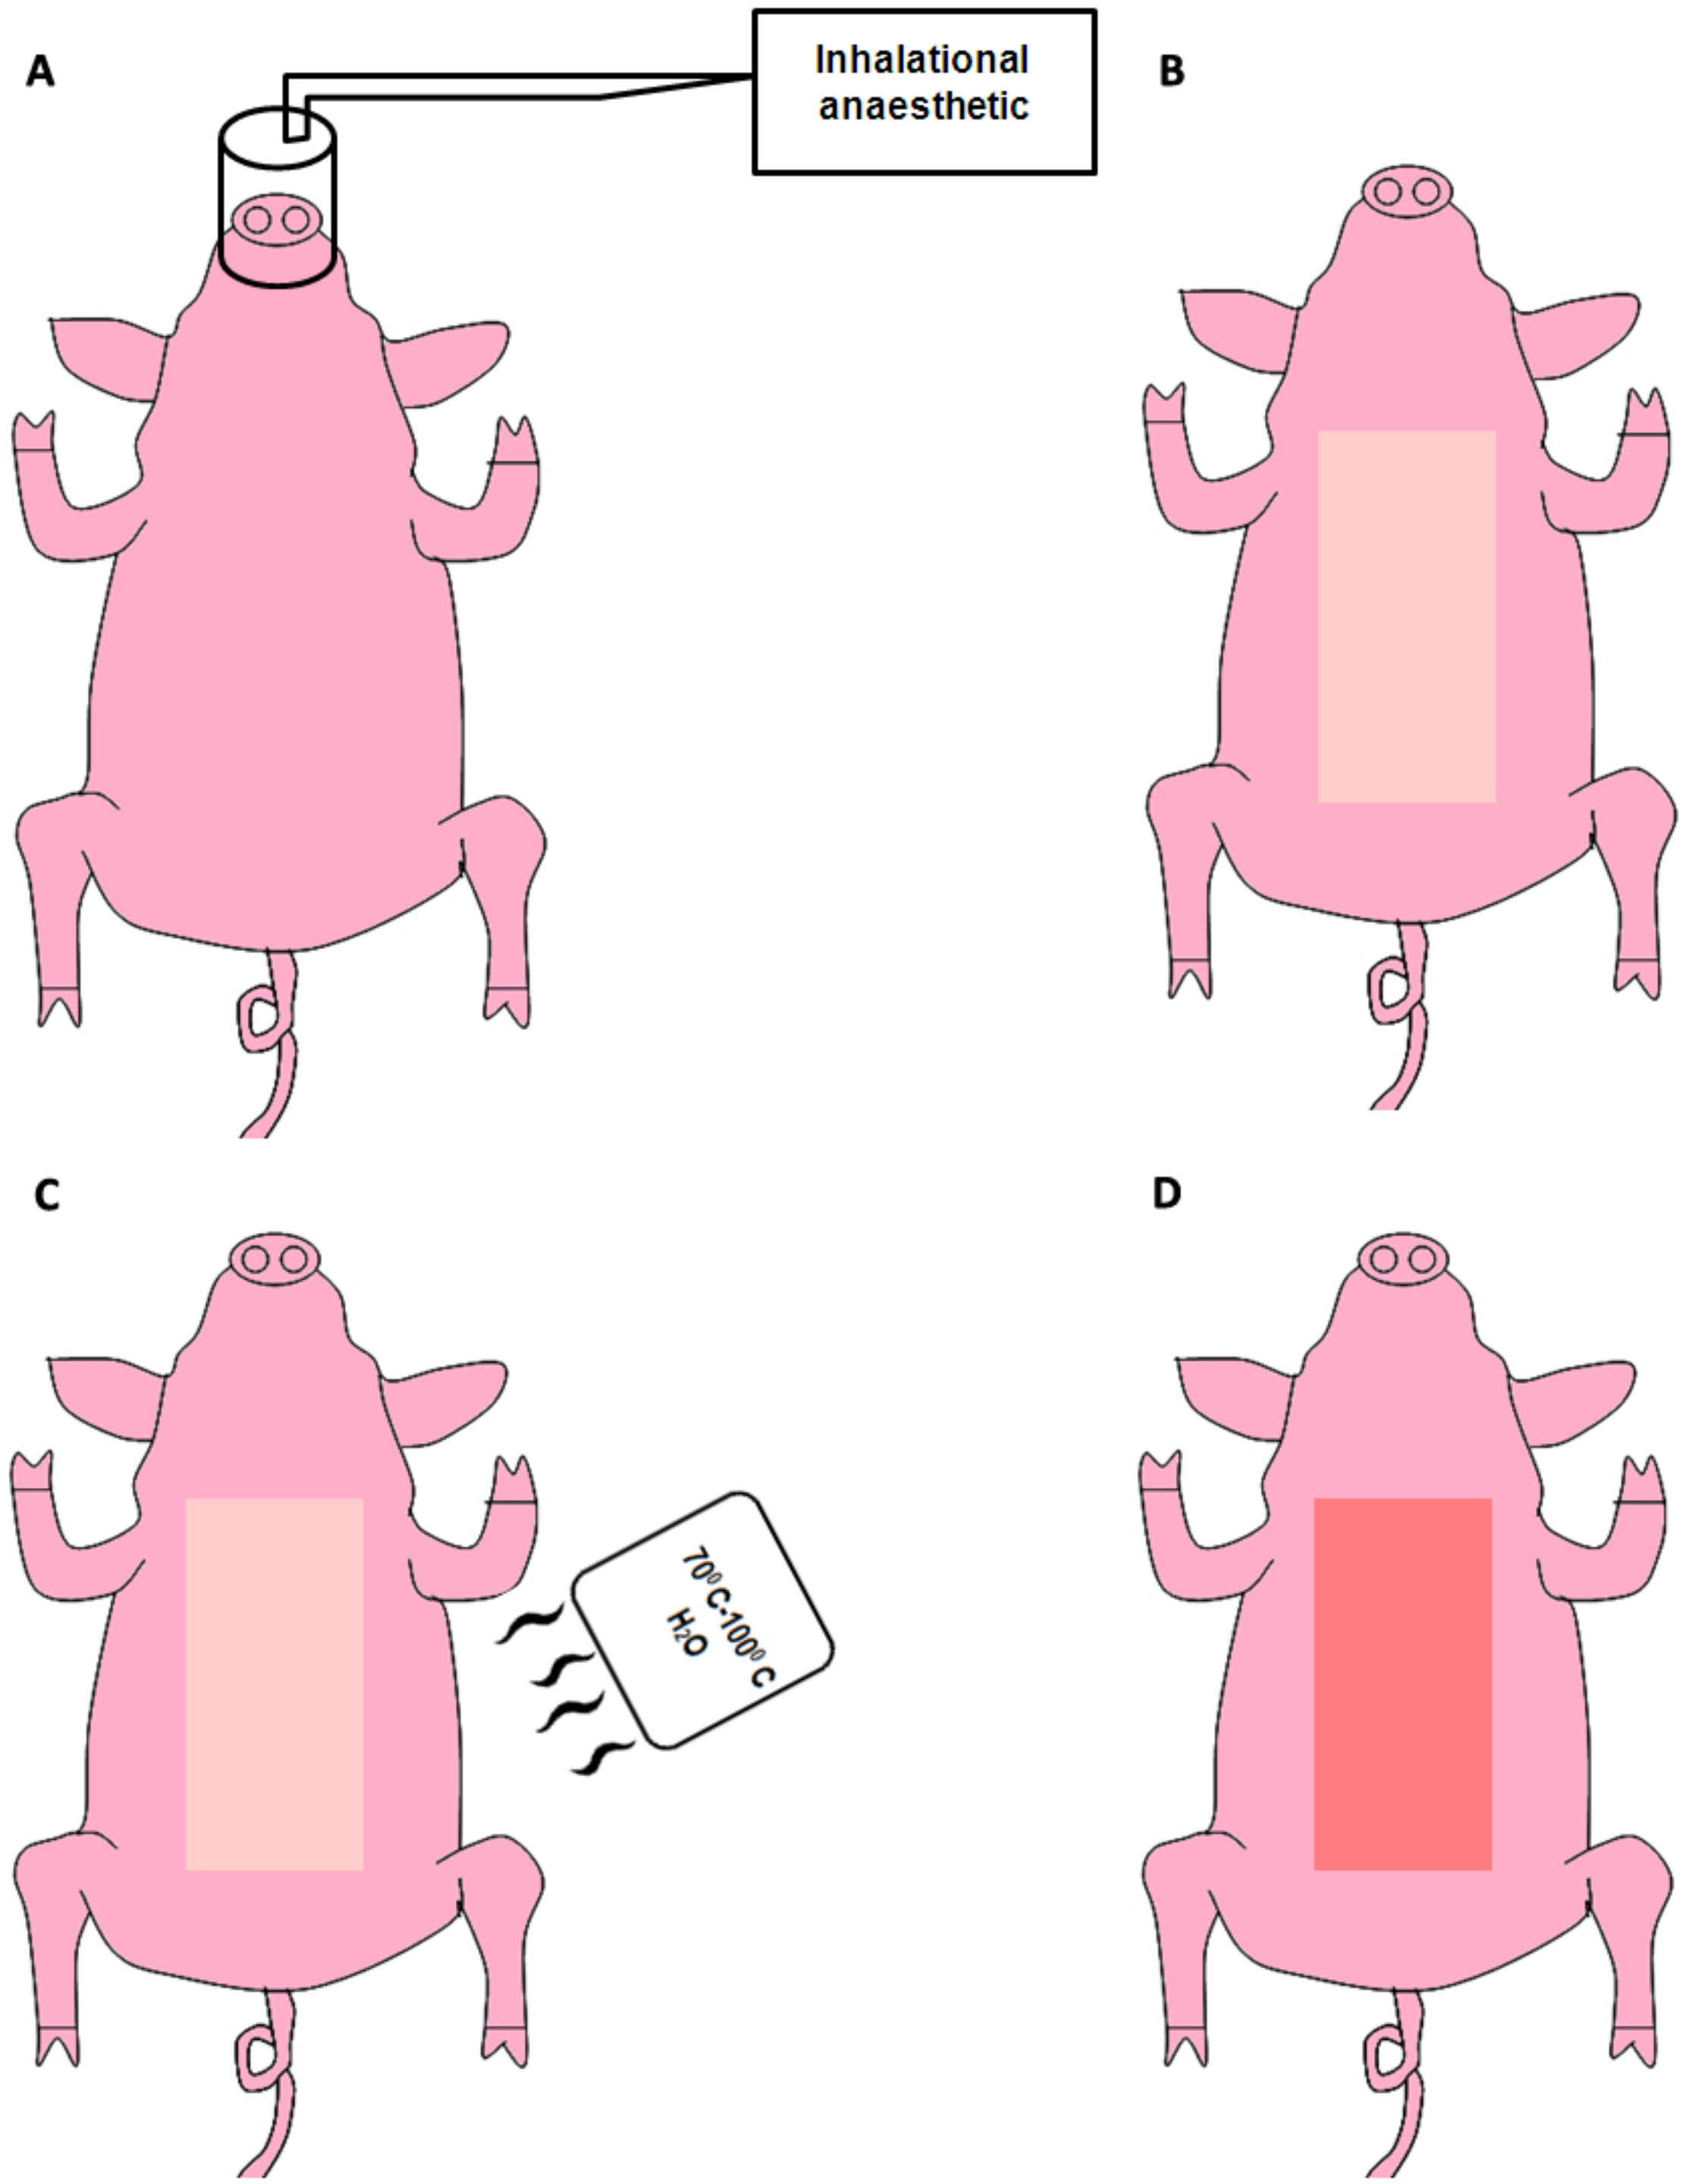

Supplement: 18_2014_1612_MOESM2_ESM.pdf [file 18_2014_1612_MOESM2_ESM.pdf]
